# Supplementary material
Source: PubMed Central journal article supplement (PMC5362747)
Supplement: ac6b03756_si_001.pdf [file ac6b03756_si_001.pdf]

# Supporting information:

## Towards an optimized workflow for middle-down proteomics

Alba Cristobal<sup>1,2,\*</sup>, Fabio Marino<sup>1,2,\*</sup>, Harm Post<sup>1,2</sup>, Henk W.P. van den Toorn<sup>1,2</sup>, Shabaz Mohammed<sup>1,2,3</sup> and Albert J. R. Heck<sup>1,2</sup>

<sup>1</sup> Biomolecular Mass Spectrometry and Proteomics Group, Bijvoet Center for Biomolecular Research, Utrecht University, Padualaan 8, 3584 CH Utrecht, The Netherlands

<sup>2</sup> Netherlands Proteomics Center, Padualaan 8, 3584 CH Utrecht, The Netherlands

<sup>3</sup> Departments of Chemistry and Biochemistry, University of Oxford, New Biochemistry building, South Parks Road, Oxford, OX1 3QU Oxford, UK

\* The authors contributed equally to this work

Corresponding authors: A.J.R.H. ([a.j.r.heck@uu.nl](mailto:a.j.r.heck@uu.nl)) and S.M. ([shabaz.mohammed@chem.ox.ac.uk](mailto:shabaz.mohammed@chem.ox.ac.uk))

### Contents:

Supplementary Experimental Procedure.

Figure S-1. Detailed experimental flow chart of the tested parameters in order to create an optimized workflow for middle-down proteomics

Figure S-2. Cleavage specificity and number of missed cleavages observed in trypsin, Asp-N, Glu-C and formic acid HeLa lysate digests.

Figure S-3. Performance of the optimized SCX separation and the effect of the material pore size for the analysis of middle-range sized peptides.

Figure S-4. Performance of the 80 and 300 Å pore size material in RP chromatography.

Figure S-5. Peptide sequence fragmentation coverage obtained by each fragmentation method in the three applied digestion schemes.

Figure S-6. Performance of the peptide fragmentation techniques ETD, ETHcD and HCD for  $z = +2$  and  $z = +3$  peptides binned by their different Mw values.

Figure S-7. Performance of the peptide fragmentation techniques ETD, ETHcD and HCD for each digestion data set (Asp-N, Glu-C and FA) binned by their different Mw values.

Figure S-8. Comparison of the Mw distribution of the identified peptides in conventional ETHcD and ETHcD with charge triggered MS/MS.

Figure S-9. Effect of deconvolution on Mascot and Sequest searches for the identification of middle-range peptides.

Table S-1. Summary of the protein and peptide identifications.

Table S-2. Performance of the FA induced digestion at different incubation times.

Table S-3. Summary of the optimization of the resolution both at the MS and MS/MS level.

Table S-4. Summary of the optimization for the injection times.

Table S-5. Summary of the parameters optimized for the different fragmentation techniques.

Table S-6. Summary of the effect of deconvolution on Mascot and Sequest for the identification of middle-range peptides

## SUPPLEMENTARY EXPERIMENTAL PROCEDURE

### Chemicals and materials

Iodoacetamide was supplied by Sigma-Aldrich (Steinheim, DE). Ammonium bicarbonate (AMBIC) and dithiothreitol were purchased from Fluka (Buchs, CH), while urea and formic acid from Merck (Darmstadt, DE). Endoproteinase Asp-N and Glu-C, PhosSTOP phosphatase inhibitor cocktail tablets and complete mini EDTA-free cocktail tablets were obtained from Roche Diagnostics (Mannheim, DE). Bradford protein assay was supplied by Bio-Rad Laboratories (Hercules, CA, USA). For the fabrication of the trap and analytical columns the following chemicals were used: acetone and 2-propanol were supplied from Merck (Darmstadt, DE), and methanol HPLC grade from Biosolve B.V. (Valkenswaard, NL). The packing materials used were Zorbax SB-C18, 1.8  $\mu\text{m}$  80 Å and 300 Å pore size and 3.5  $\mu\text{m}$  300 Å from Agilent (Santa Clara, CA, USA) and ReprosilPur 120 Å C18, 3  $\mu\text{m}$  from Dr. Maisch GmbH (Ammerbuch, DE). The reversed phase C18 300 Å solid phase extraction (SPE) columns were purchased from Grace Vydac (Columbia, MD, USA). The water used in all experiments was obtained from a Milli-Q purification system (Millipore, Bedford, MA, USA).

### Sample preparation

HeLa digests were prepared as described previously:<sup>38</sup> prior to digestion the proteins were reduced (with dithiothreitol) and carbamidomethylated (with iodoacetamide). The protein concentration was estimated by a Bradford assay and subsequently the cell lysate was split into three samples of 200  $\mu\text{g}$  for the digestion by the three applied digestion protocols. For preparing the Asp-N and Glu-C digests, the protocols reported by Giansanti *et al.* were used.<sup>39</sup>

### Formic Acid non-enzymatic digestion

For the acid induced non-enzymatic digestion, the HeLa lysate was diluted to a final concentration of 0.1  $\mu\text{g}/\mu\text{l}$  using a solution of formic acid (final concentration of 2% FA) and incubated at 100 °C. We tested incubation times from 30 min to 4 h, and studied parameters including cleavage specificity, total peptide identifications, relative yield of middle-range sized peptides and the unwanted occurrence of known side reactions (Table S-2).<sup>36</sup> The digests were analyzed in single runs and the same amount of sample (based on starting material) was injected. As a result of this evaluation we selected a 1h incubation time due to the generation of a high number of middle-sized peptides while retaining a high cleavage specificity and keeping the occurrence of side reactions low (Table S-2). Of note, compared to enzymatic methods, the acid hydrolysis at any of the tried conditions provided lower sensitivity. According to

literature, this phenomenon has been attributed to the distribution of peptide products which leads to a decrease in the absolute quantity of any single peptide due to the lower specificity of the method.<sup>35,51</sup> We cannot rule out this hypothesis, but we also believe that the overall digestion efficiency may also play an important role for this observed phenomenon, as we noticed a substantial increase in the signal of the UV trace at the end of the SCX gradient (see Figure s-3a), likely representing partially digested proteins.

### **Sample clean-up and pre-fractionation**

Following digestion sample clean-up was performed using solid-phase extraction (SPE) columns; C18 with a 300 Å pore size. Prior to the MS analysis, samples were fractionated to reduce the complexity by using strong cation exchange (SCX) chromatography. Briefly, SCX was performed on an Agilent 1100 HPLC system (Agilent Technologies, Waldbronn, Germany) using a Zorbax BioSCX-Series II column (50 mm × 0.8 mm, 250 Å 3.5 µm). SCX solvent A consisted of 0.05% formic acid in 20% acetonitrile, while solvent B was 0.05% formic acid, 0.5 M NaCl in 20% acetonitrile. ~200 µg peptides were dissolved in 10% FA and loaded onto the SCX column with buffer A. Special attention was given not only to the pore size of the SCX material, but we also applied a modulated gradient which favors the separation of highly charged peptides. In this way, the elution window of peptides with  $z < +4$  is reduced, favoring the separation and collection of higher charged peptides (Figure s-3a). In more detail the following gradient was used: 0–5 min (0% B); 5–7 min (0–2% B); 7–15 min (2–3% B); 15–25 min (3–8% B); 25–35 min (8–20% B); 35–45 min (20–40% B); 45–51 min (40–90% B); 51–55 min (90–90% B); 55–56 min (90–0% B) and 56–100 min (0% B). A total of 50 SCX fractions were collected, pooled into 11 fractions and dried in a vacuum centrifuge.

### **LC-MS and LC-MS/MS set up**

Nano-UHPLC-MS/MS was performed on an Agilent 1290 Infinity System (Agilent Technologies, Waldbronn, DE) connected to an Orbitrap Fusion (Thermo Fisher Scientific, San Jose, CA). Fused-silica capillary analytical and trap columns were prepared as previously described.<sup>40</sup> The UHPLC was equipped with a double frit trapping column and a single frit analytical column. A ReprosilPur C18 (3 µm particles, 120 Å pore size 2 cm x 100 µm) was used as a trap column, and Zorbax SB-C18 (1.8 µm particles 80 Å 40 cm x 50 µm) for the analytical column. For the 300 Å pore size set up the used materials were: Zorbax SB-C18 (3.5 µm particles, 300 Å pore size, 2 cm x 100 µm) for the trap, and Zorbax SB-C18 (1.8 µm particles 300 Å 40 cm x 50 µm) for the analytical column. The column, in both cases, was directly

connected to an in-house pulled and gold-coated fused silica needle (with a 5  $\mu\text{m}$  o.d. tip). In both systems the generated back pressure was comparable, although the conventional RP C18 material blocked several times when middle-sized peptides were analyzed, likely due to poor mass transfer and precipitation. A voltage of 2.0 kV was applied to the needle and the ion transfer tube temperature was increased to 275 degrees. The survey scan range was from 350 to 1500  $m/z$  at a resolution of 60000 (200  $m/z$ ) with an AGC target of  $4e5$ . The most intense precursor ions were selected for subsequent fragmentation at Top Speed within a 3 seconds duty cycle. A resolution of 30000 (200  $m/z$ ) and a maximum injection time of 125 ms were found to be ideal for MS/MS. The AGC target for the MS/MS was set to  $1e5$ . When HCD was used 35% collision energy (CE) was applied, in the case of ETHcD 40% supplemental activation (SA) was selected and when ETD was used 10% SA was applied. Additionally charge triggered MS/MS, instead of intensity triggered, was tested for the ETHcD charge method.

### Data analysis

The RAW files were processed using Proteome Discoverer (PD, version 2.1, Thermo Scientific, Bremen, DE) and the spectra were searched against the UniProt human database (version 2015\_04). Searching was performed using Sequest HT and the following parameters were used: unspecific searches with cysteine carbamidomethylation as fixed modification and oxidation of methionine as dynamic modifications. In the case of the FA induced digestion two additional dynamic modifications were included: formylation of the N-terminus and the conversion from Glutamate to pyro-Glutamate. Specific searches were performed by Sequest HT and Mascot (version 2.5.1, Matrix Science, London, UK) using the same modifications. Peptide tolerance was set to 10 ppm and MS/MS tolerance was set to 0.05 Da. The results were filtered using Percolator<sup>41,42</sup> to a peptide and protein FDR < 1%. We further only accepted peptides with an Xcorr of at least 2. We performed an in-silico digest for the overall population of observed peptides for each enzyme, taking missed cleavages into account. The median of the peptide masses was then calculated in R.<sup>65</sup> The parameters used to perform the in-silico digestion were: Glu-C cleavage C-terminal of E with maximum 2 missed cleavages. Asp-N cleaves N-terminally of DE and maximum 4 missed cleavages were allowed. Peptide sequence fragment coverage was calculated using in-house developed scripts. Theoretical ion series were calculated for each fragmentation method (b and y for CID and HCD, c and z for ETD and b, y, c and z for ETHcD). Matching was performed with a tolerance of 0.05 Da, for peaks with intensities higher than 5% of the base peak. The global fragmentation coverage was calculated based on all possible fragments, disregarding the exact breakage positions. The H-score script was used to deconvolute the mgf files exported from PD.<sup>63</sup>

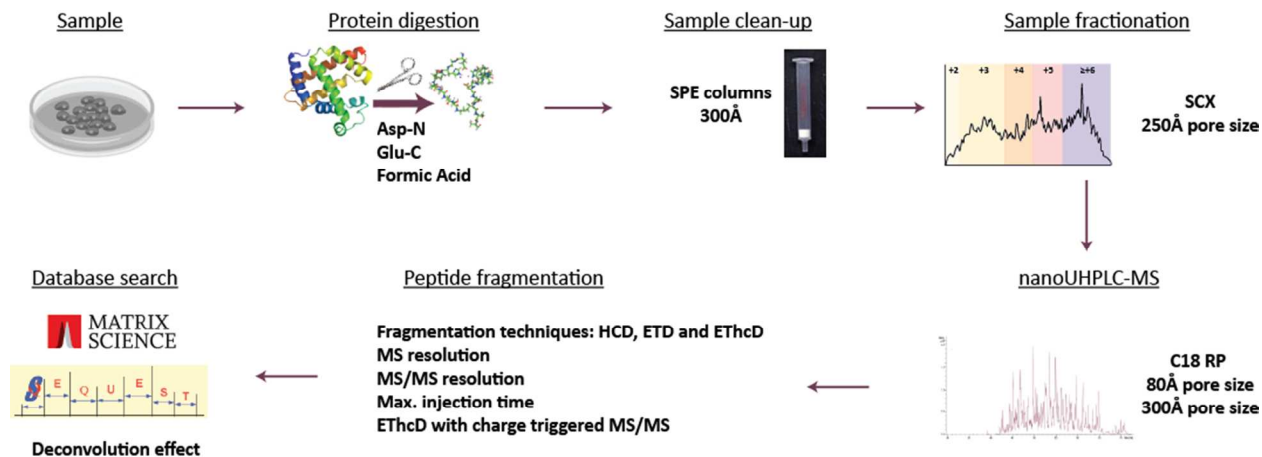

Figure S-1. Detailed experimental flow chart of the tested parameters in order to create an optimized workflow for middle-down proteomics.

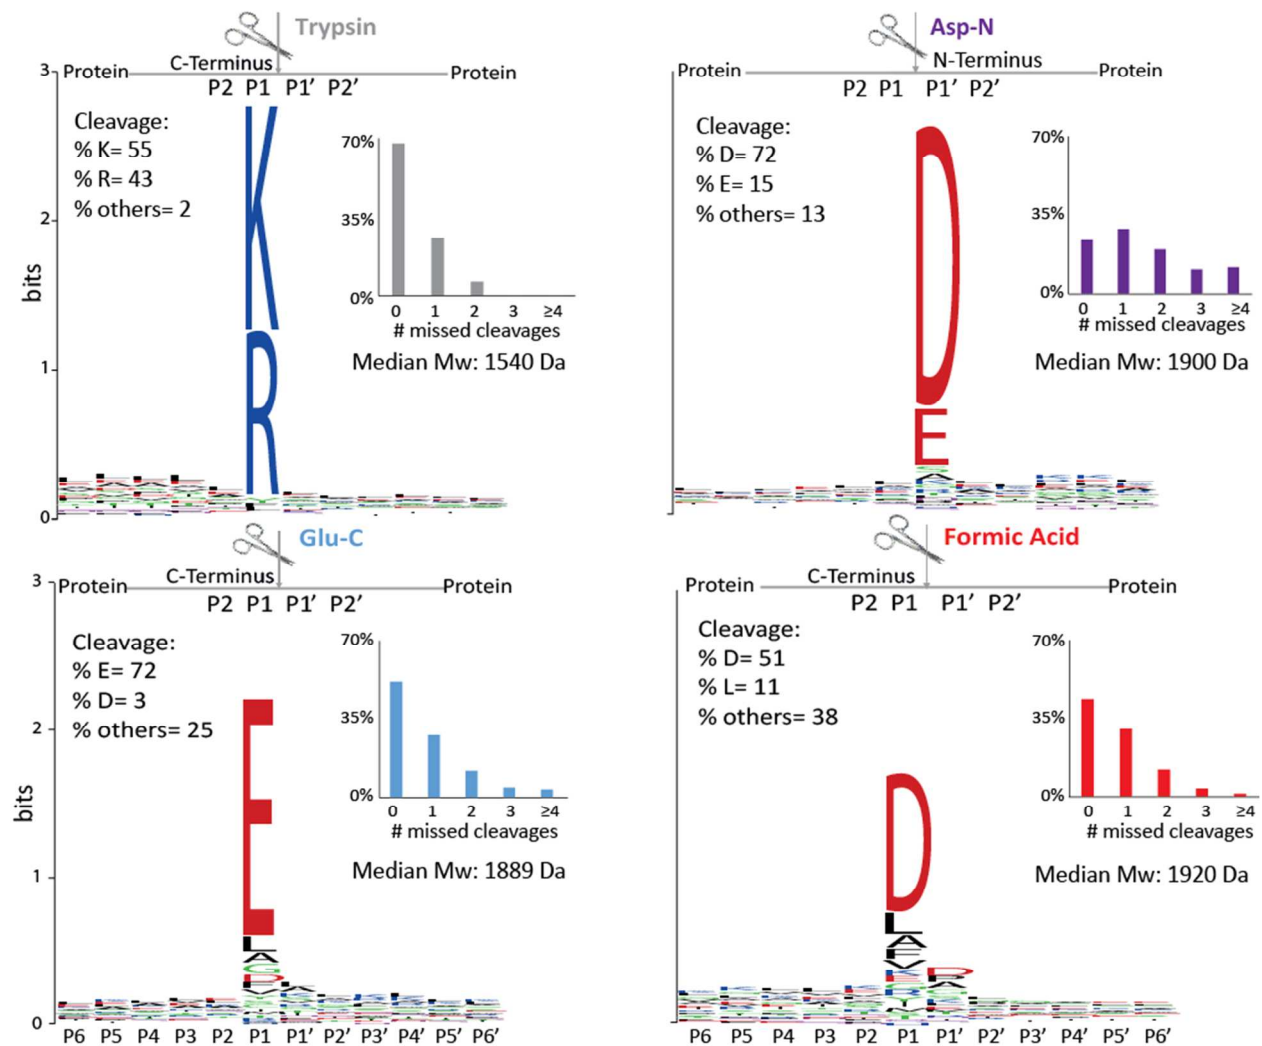

**Figure S-2. Cleavage specificity and number of missed cleavages observed in trypsin, Asp-N, Glu-C and formic acid HeLa lysate digests.** The cleavage specificity, displayed by relative frequency of occurrence, is depicted at the C-terminal (P6 to P1) and N-terminal (P1' to P6') end of the cleavage site. Asp-N showed a high cleavage specificity for the N-terminal side of Aspartate (D) residues (72%) and lower cleavage frequency at the N-terminal side of Glutamate (E) (15 %). At a pH of approx. 8 and in ammonium bicarbonate buffer Glu-C mainly cleaves at the C-terminal side of Glutamate (E) residues (72%). The inset in each panel displays the proportion of missed cleavages and the median Mw of all identified peptides.

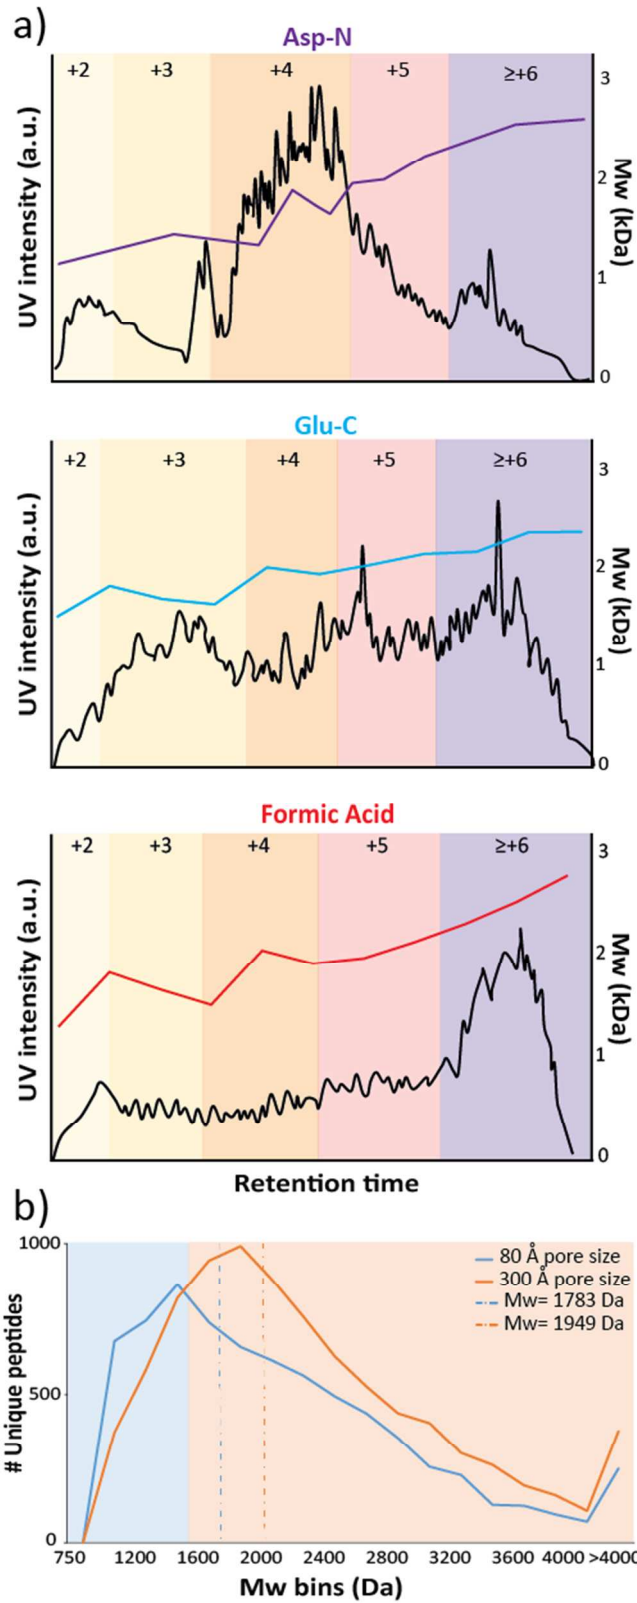

Figure S-3. Performance of the optimized SCX separation and the effect of the material pore size for the analysis of middle-range sized peptides.



- a) The UV traces (arbitrary unit) detected in the SCX separations of the, from top to bottom, Asp-N, Glu-C and FA digestions, together with the in solution charge state distribution of peptides identified in the SCX fractions. The correlation between the charge state and the median of the molecular weight for the different SCX fractions is also represented, using the secondary y-axis of the graphs.
- b) Peptide Mw distribution observed by using the conventional (80 Å) and the larger pore size (300 Å) materials for the columns in the UHPLC system. Eleven SCX Asp-N fractions were analyzed and the median Mw in these fractions was calculated using the uniquely identified peptides.

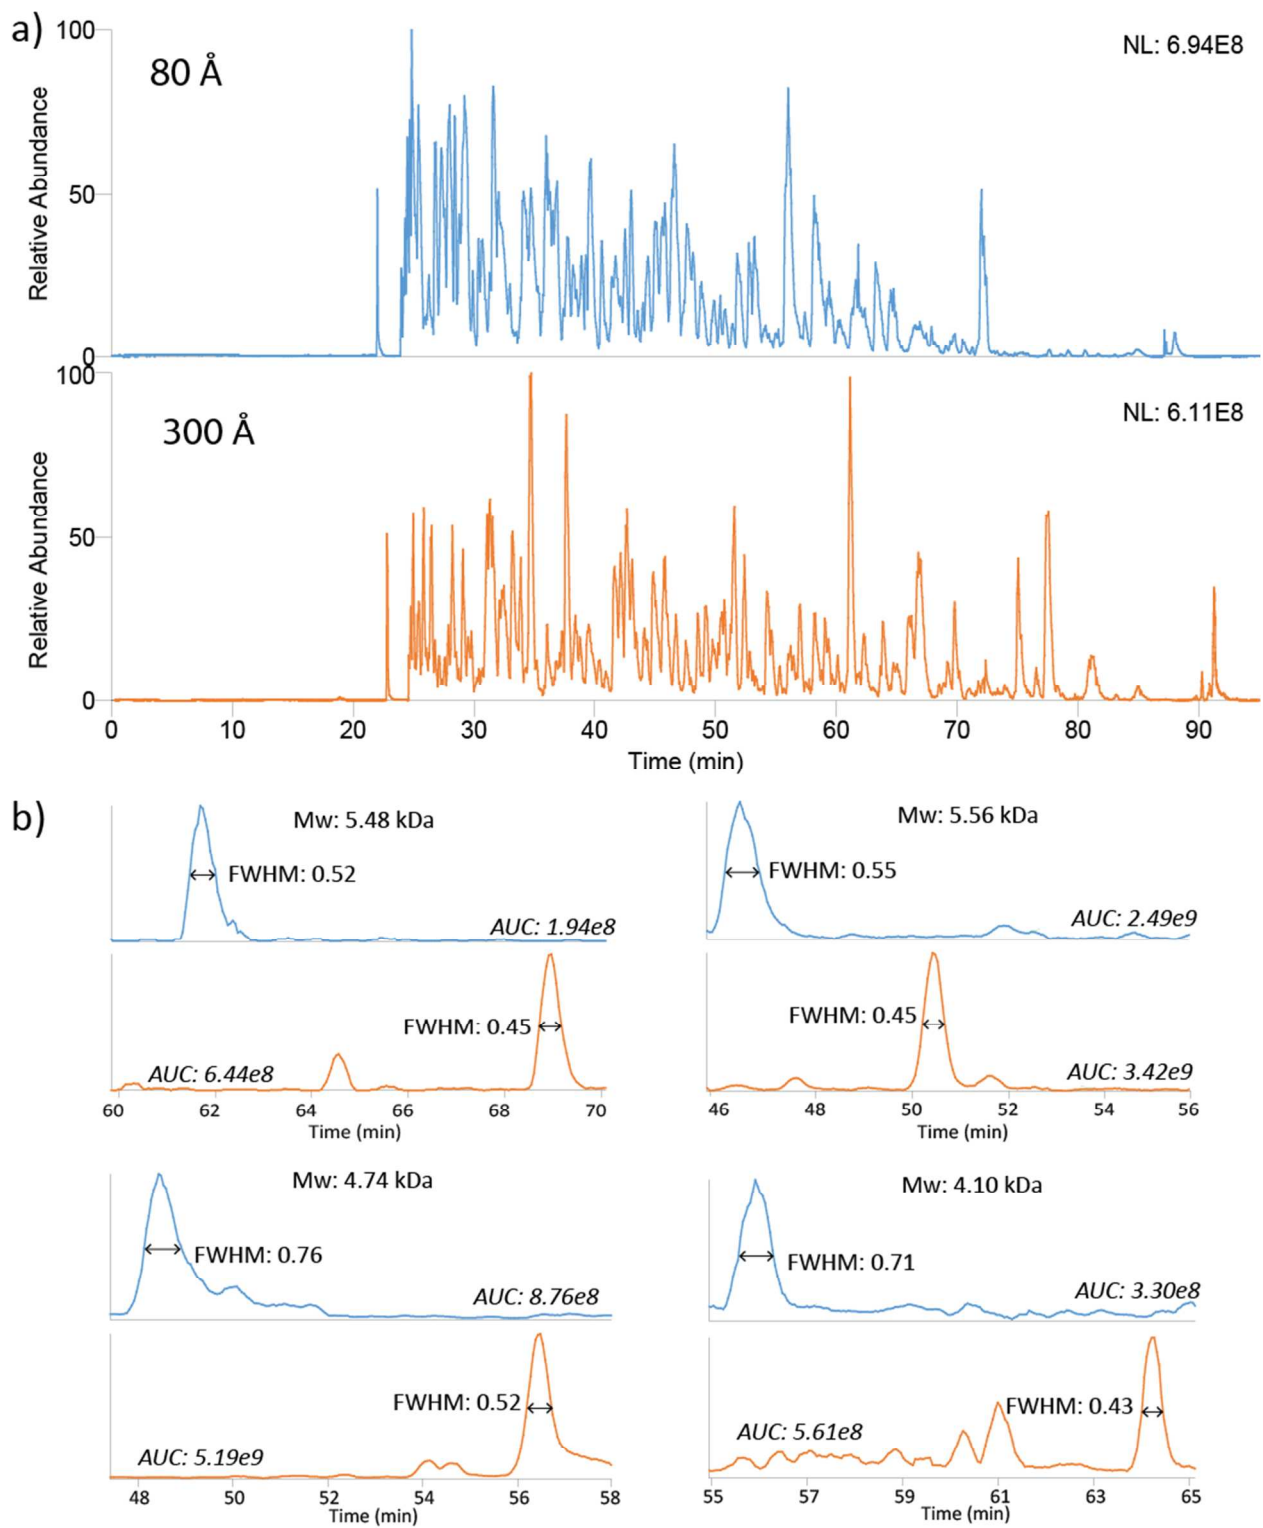

Figure S-4. Performance of the 80 and 300 Å pore size material in RP chromatography.

- a) Chromatograms obtained by injecting the same amount of starting material (late SCX fraction of the Asp-N digest) analyzed on the 80 Å (upper panel, blue line) and the 300 Å (bottom panel, orange line) pore size columns.
- b) Illustrative extracted ion chromatograms of four peptides exhibiting a Mw > 4 kDa analyzed by using either the 80 Å (blue line) or 300 Å (orange line) pore size columns. The area under the curve (AUC) and the full weight at half maximum (FWHM) are depicted in the panels.

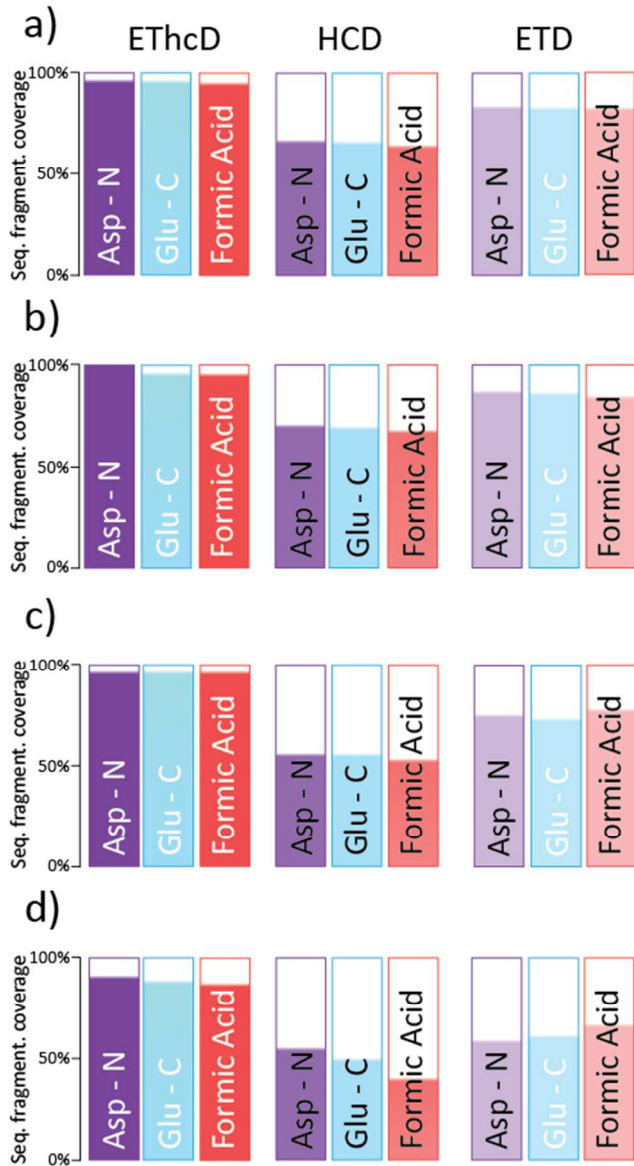

Figure S-5. Peptide sequence fragmentation coverage obtained by each fragmentation method in the three applied digestion schemes. The median peptide sequence fragmentation coverage was calculated and

represented taking into consideration a) the whole dataset, b) peptides with  $0 < Mw < 2.5$  kDa, c) peptides with  $2.5 < Mw < 4$  kDa and d) peptides with  $Mw > 4$  kDa.

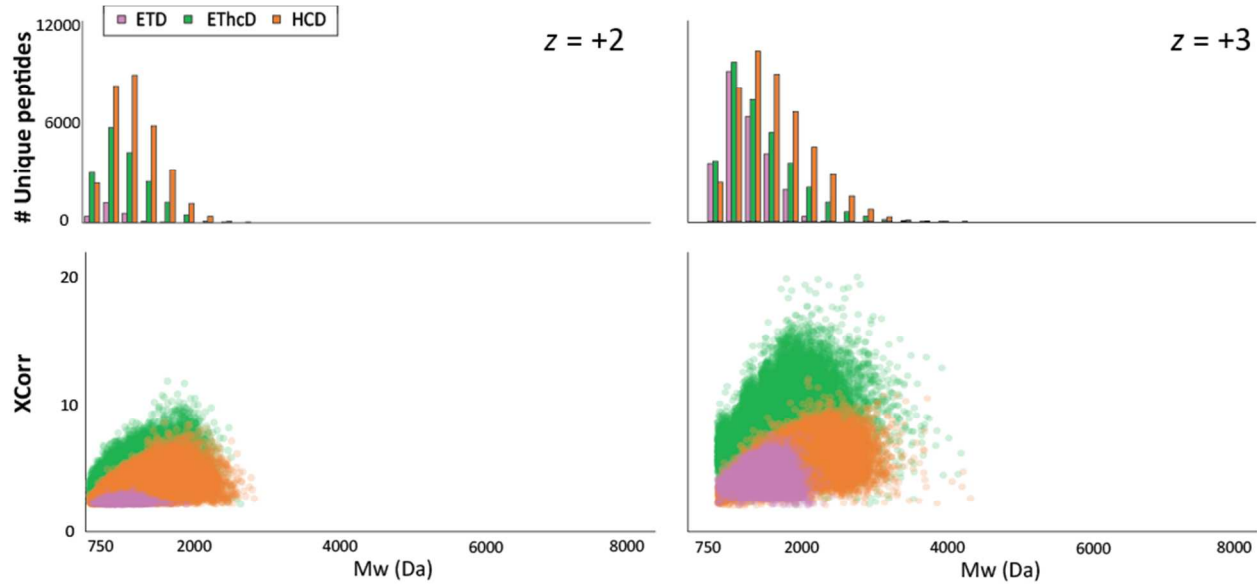

**Figure S-6. Performance of the peptide fragmentation techniques ETD, ETHcD and HCD for  $z = +2$  and  $z = +3$  peptides binned by their different Mw values.** Combined data from Asp-N, Glu-C and FA induced HeLa digestions analyzed under the same LC settings, with optimized fragmentation parameters for ETD, ETHcD and HCD. The number of identifications as well as the XCorr distribution (as a measure for spectra quality) are categorized by their  $z$  and Mw ranges.

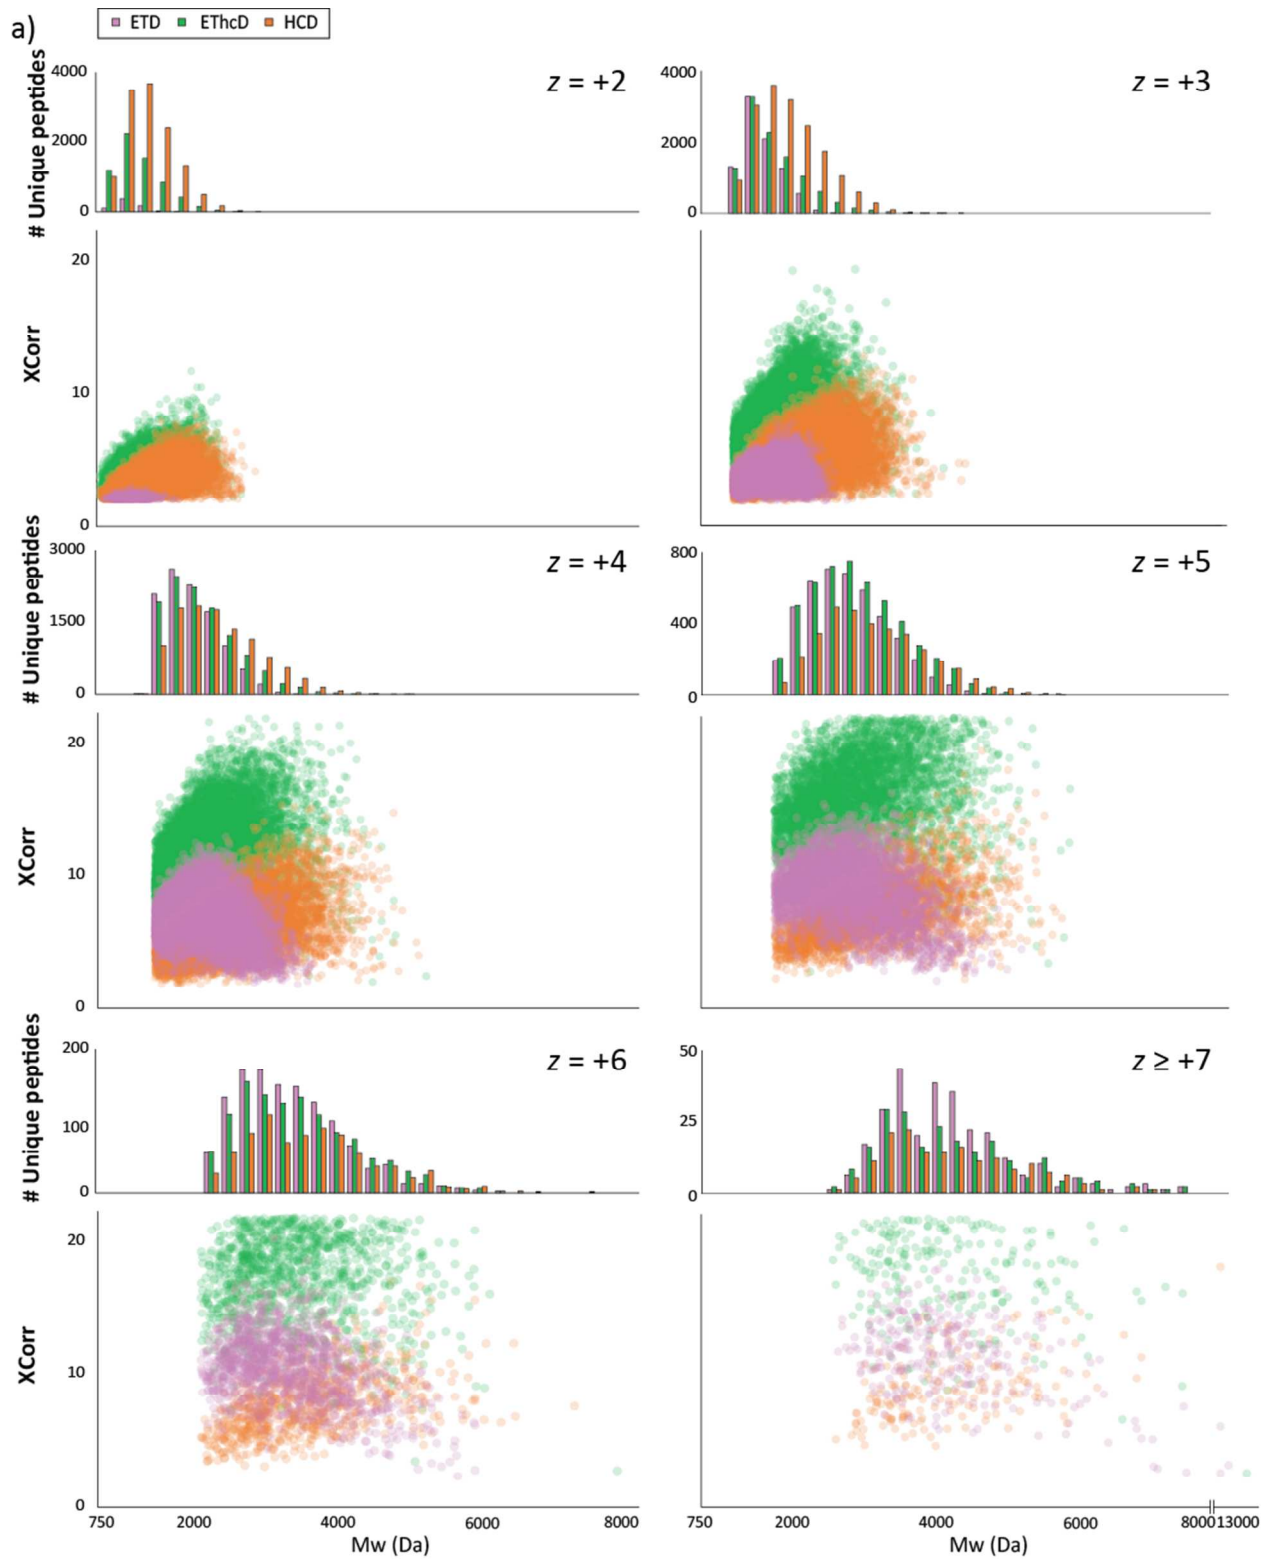

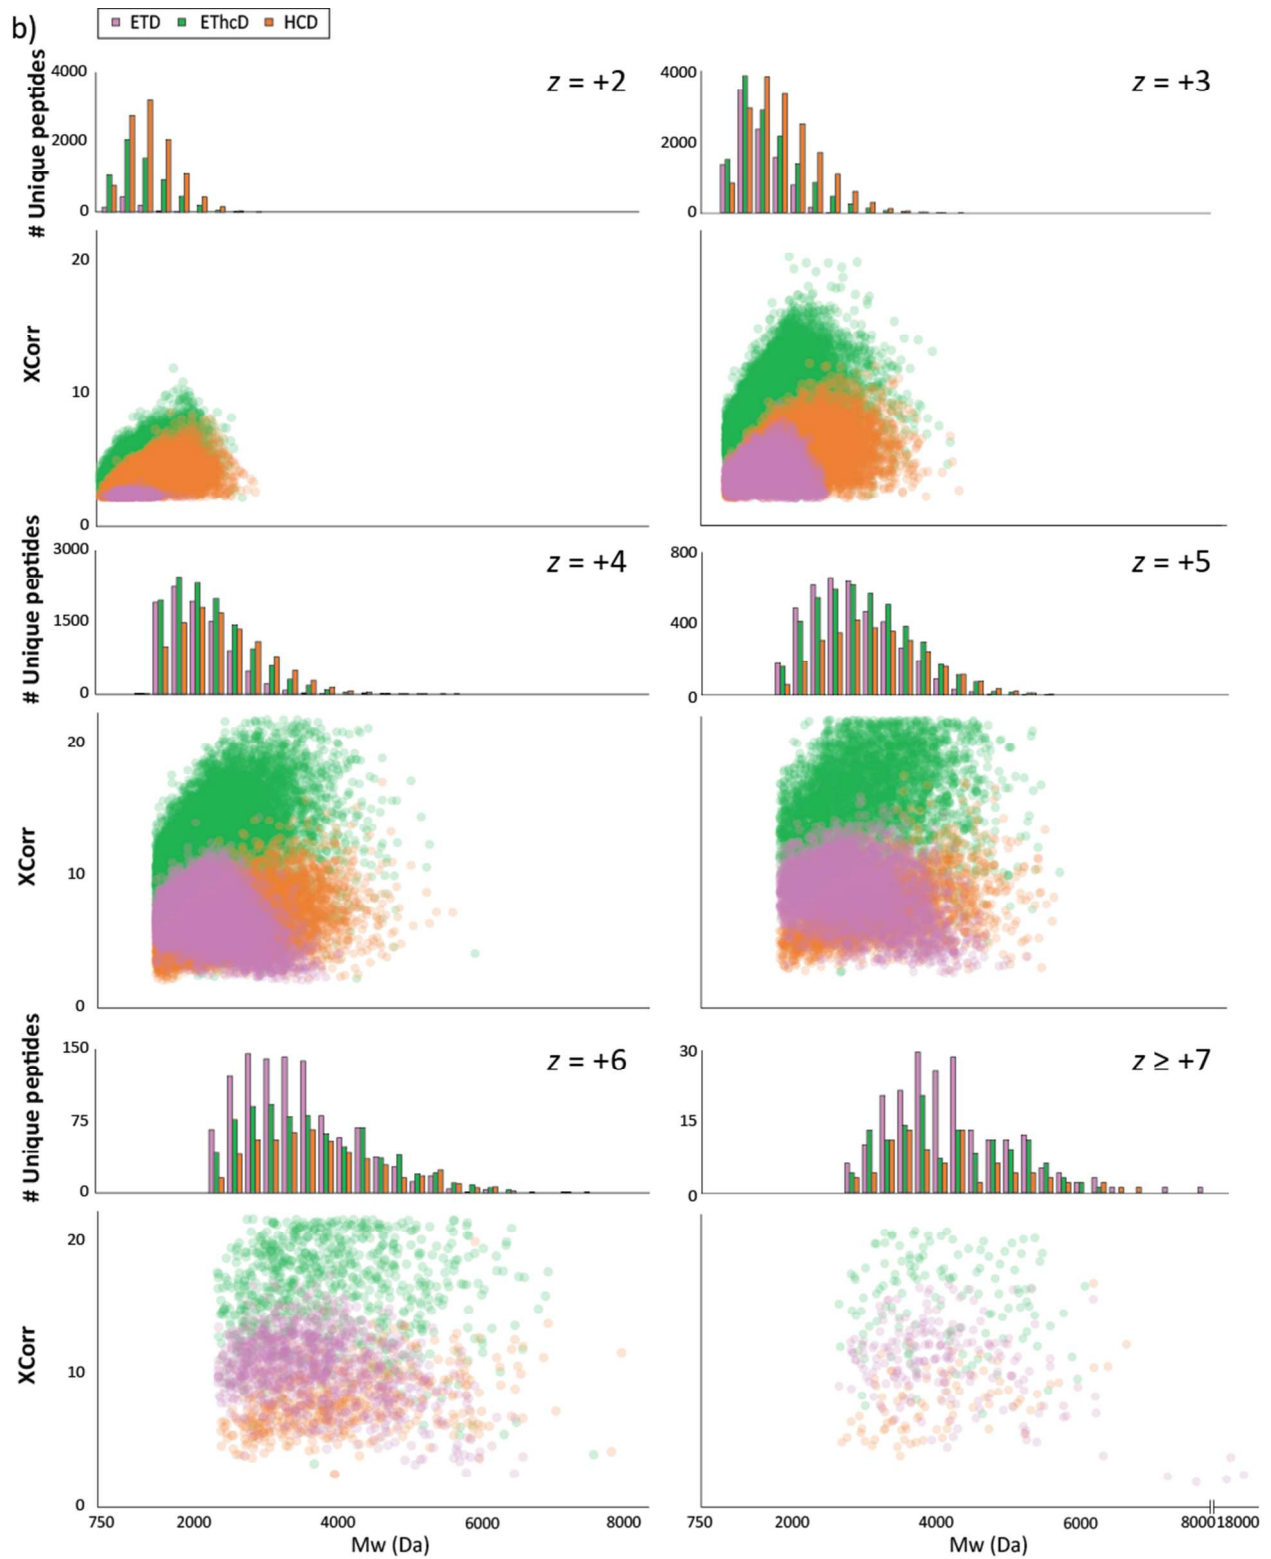

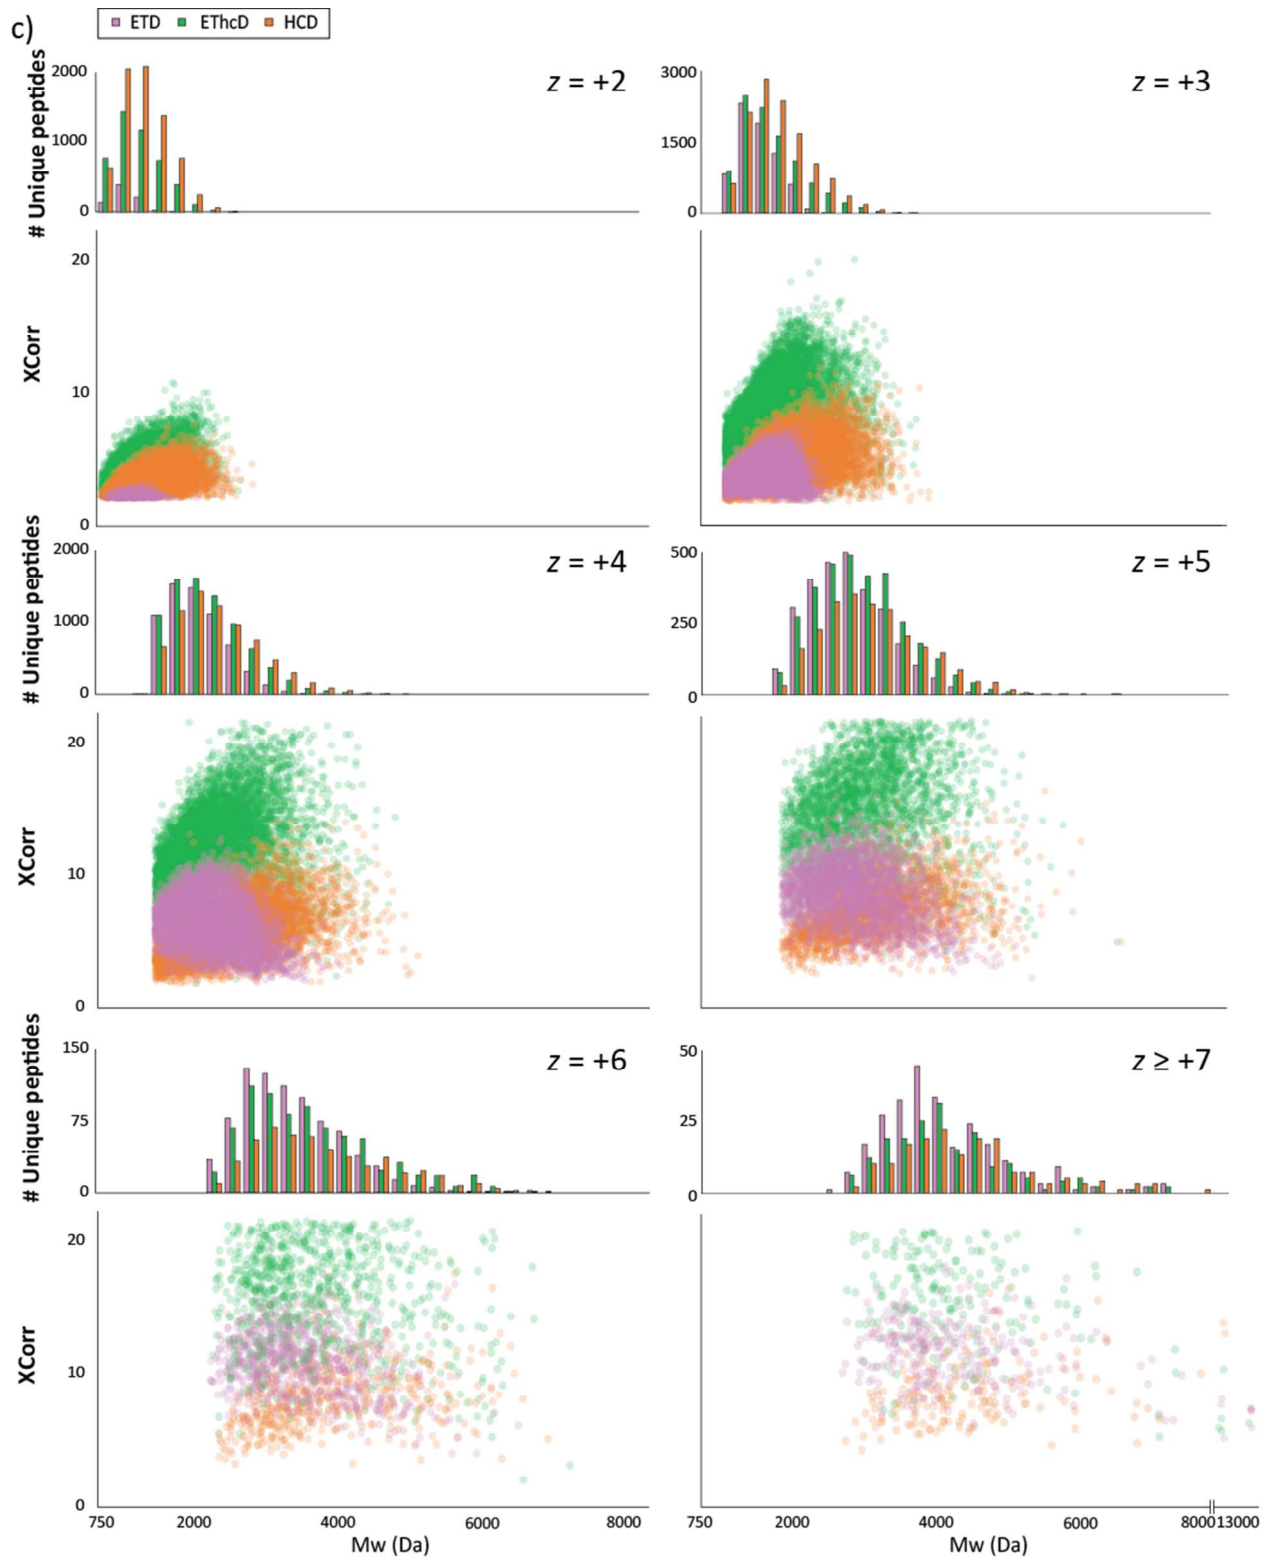

**Figure S-7. Performance of the peptide fragmentation techniques ETD, EThcD and HCD for each digestion data set (Asp-N, Glu-C and FA) binned by their different Mw values.** Data from Asp-N (a), Glu-C (b) and FA (c) induced HeLa digestions analyzed under the same LC settings, with optimized fragmentation parameters for ETD, EThcD and HCD. The number of identifications as well as the XCorr distribution (as a measure for spectra quality) are categorized by their z and Mw ranges.

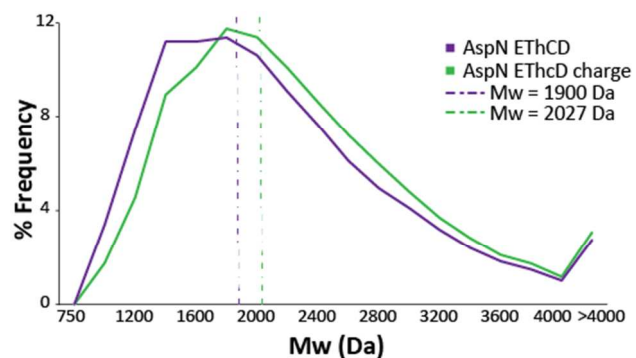

**Figure S-8. Comparison of the Mw distribution of the identified peptides in conventional EThcD and EThcD with charge triggered MS/MS.** Frequency distribution of the Mw of the identified peptides by EThcD (purple) and EThcD with charge triggered MS/MS (green) when the eleven Asp-N SCX fractions are analyzed using identical experimental conditions. The median of the Mw is represented by dashed lines.



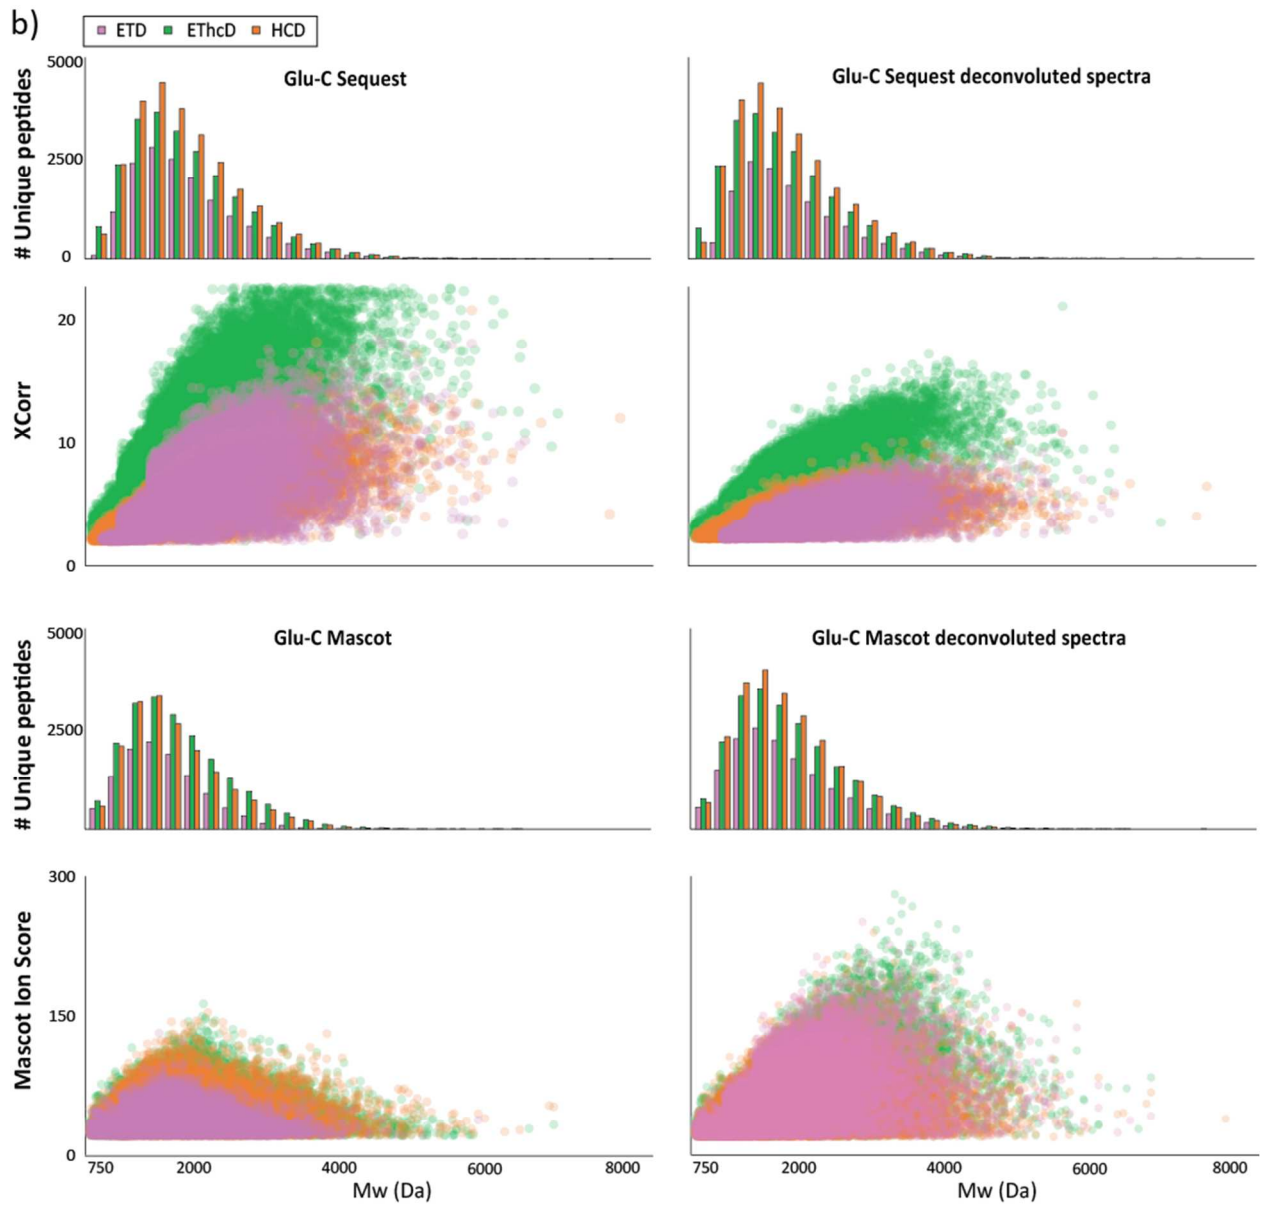

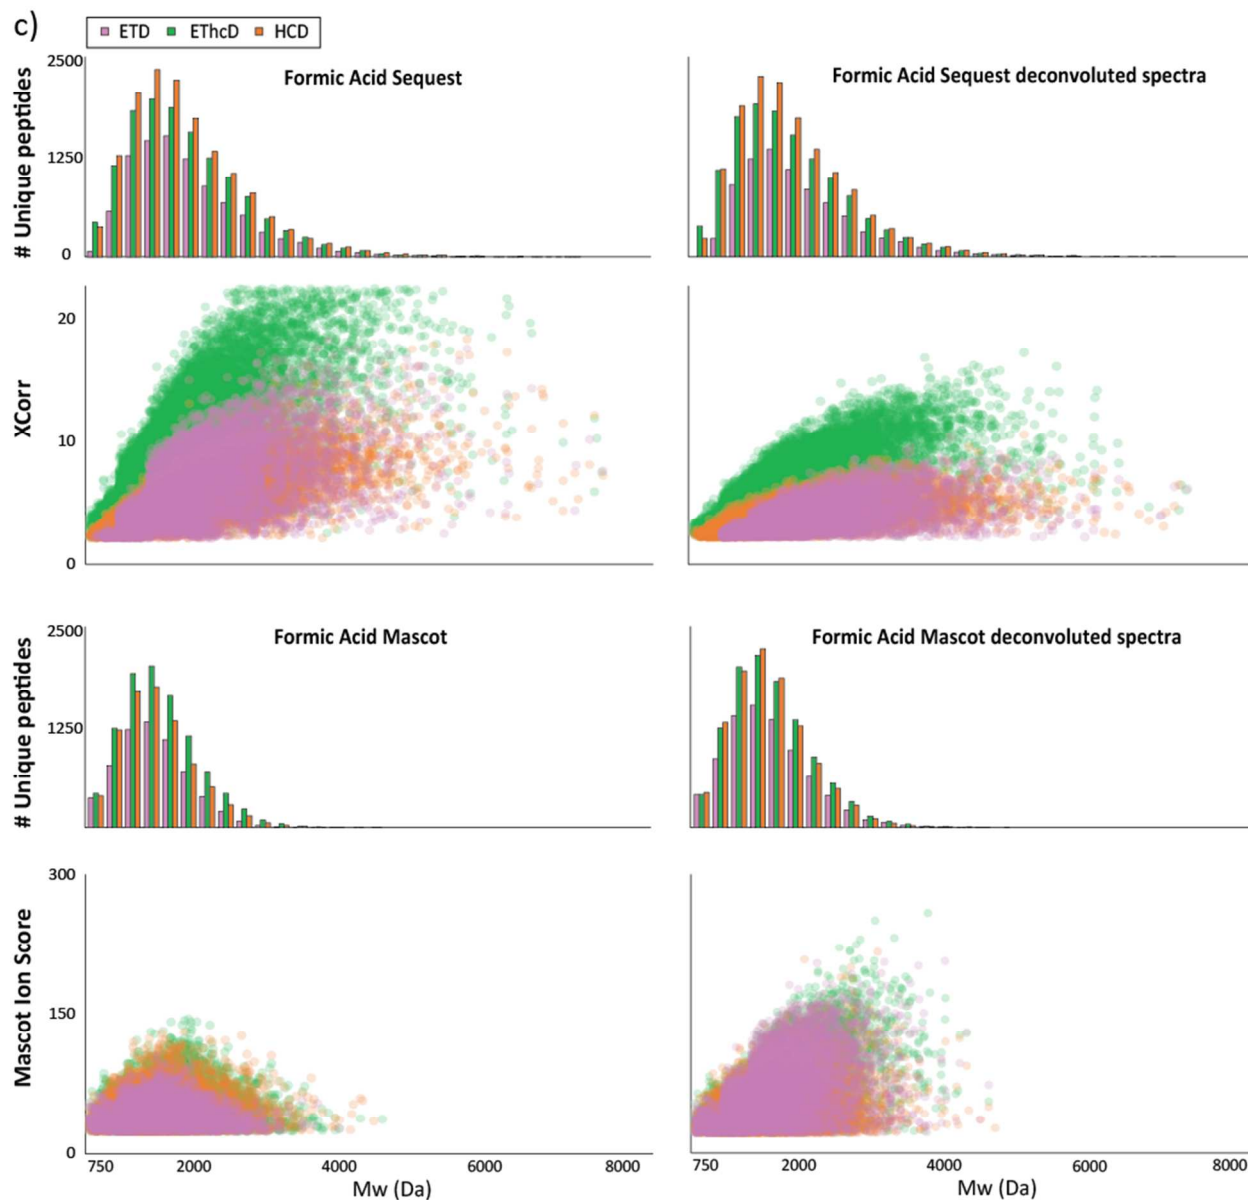

**Figure S-9. Effect of deconvolution on Sequest and Mascot searches for the identification of middle-range peptides.** Specific searches were performed by Sequest HT and Mascot on Glu-C (a) and FA (b) induced HeLa digestions data sets for each of the optimized fragmentation methods (ETD, ETHcD and HCD). The number of identifications as well as the XCorr distribution (as a measure for spectra quality) are categorized by their Mw ranges for deconvoluted and non deconvoluted spectra search by Sequest HT and Mascot.

## Table legend

**Table S-1.** Summary of the protein and peptide identifications obtained for the Asp-N, Glu-C and FA initiated digest using the three different fragmentation modes (ETHcD, HCD and ETD). The identifications rate (Id rate) and the median Mw are also depicted.

| Digestion   | Fragmentation | Proteins | Unique peptides | PSMs   | MS/MS  | Id rate (%) | Mw (Da) |
|-------------|---------------|----------|-----------------|--------|--------|-------------|---------|
| Asp-N       | ETHcD         | 4895     | 34307           | 100695 | 178059 | 56.6        | 1900.0  |
| Asp-N       | HCD           | 5099     | 44239           | 133823 | 349702 | 38.3        | 1870.9  |
| Asp-N       | ETD           | 4681     | 25228           | 66643  | 185089 | 36          | 1952.1  |
| Glu-C       | ETHcD         | 4354     | 37141           | 121197 | 211235 | 57.4        | 1888.0  |
| Glu-C       | HCD           | 4374     | 41195           | 134990 | 372620 | 36.2        | 1888.8  |
| Glu-C       | ETD           | 3935     | 24833           | 67447  | 192643 | 35.0        | 1913.0  |
| Formic Acid | ETHcD         | 3054     | 26520           | 63791  | 186812 | 34.2        | 1920.0  |
| Formic Acid | HCD           | 2942     | 29515           | 72166  | 343772 | 21.0        | 1891.0  |
| Formic Acid | ETD           | 2693     | 18107           | 36147  | 170125 | 21.3        | 1930.9  |

**Table S-2.** Performance of the FA induced digestion at different incubation times. The table depicts also the percentage of observed cleavages at the C-terminus of D, the number of identified unique peptides, the median Mw of all detected peptides and the percentage of the unwanted side reactions observed.

| Digestion   | Incubation Time | % C-Term D | Unique peptides | Median Mw (Da) | % Side reactions |
|-------------|-----------------|------------|-----------------|----------------|------------------|
| Formic Acid | 30 min          | 41         | 5755            | 2009           | 1.0              |
| Formic Acid | 1 h             | 51         | 6000            | 1950           | 1.3              |
| Formic Acid | 2 h             | 52         | 6523            | 1919           | 2.1              |
| Formic Acid | 3h              | 48         | 6485            | 1920           | 3.0              |
| Formic Acid | 4h              | 43         | 6351            | 1916           | 4.3              |

**Table S-3.** Summary of the optimization of the resolution both at the MS and MSMS level, including the number of identifications, quality of the spectra and median Mw of SCX fractions containing peptides of different charge states.

| Charge state | <u>MS 120000 MS/MS 30000</u> |                 |         |       | <u>MS 60000 MS/MS 15000</u> |                 |         |       |
|--------------|------------------------------|-----------------|---------|-------|-----------------------------|-----------------|---------|-------|
|              | Xcorr                        | Unique Peptides | Mw (Da) | MS/MS | Xcorr                       | Unique Peptides | Mw (Da) | MS/MS |
| +3           | 6                            | 1486            | 1439    | 11299 | 6                           | 1463            | 1423    | 11623 |
| +4           | 8                            | 2162            | 2389    | 12802 | 8                           | 2023            | 2349    | 13331 |
| +5           | 10                           | 2547            | 2459    | 13472 | 9                           | 2368            | 2425    | 14302 |
| +6           | 9                            | 1722            | 2648    | 11420 | 9                           | 1697            | 2620    | 12463 |

| Charge state | <u>MS 120000 MS/MS 30000</u> |                 |         |       | <u>MS 60000 MS/MS 30000</u> |                 |         |       |
|--------------|------------------------------|-----------------|---------|-------|-----------------------------|-----------------|---------|-------|
|              | Xcorr                        | Unique Peptides | Mw (Da) | MS/MS | Xcorr                       | Unique Peptides | Mw (Da) | MS/MS |
| > +5         | 13                           | 3049            | 2607    | 17895 | 13                          | 3190            | 2604    | 19095 |
| > +5         | 13                           | 1598            | 2893    | 16239 | 13                          | 1623            | 2893    | 16943 |
| > +5         | 12                           | 860             | 3073    | 15516 | 11                          | 934             | 3051    | 16206 |

**Table S-4.** Summary of the optimization for the injection times, including the number of identifications, quality of the spectra and the median peptide sequence coverage.

| Max. injection time (ms) | Xcorr | Unique Peptides | # MS/MS | Peptide sequence coverage (%) |
|--------------------------|-------|-----------------|---------|-------------------------------|
| 75                       | 6     | 5429            | 20977   | 88                            |
| 100                      | 7     | 5433            | 19103   | 89                            |
| 125                      | 7     | 5389            | 17884   | 91                            |

**Table S-5.** Summary of the parameters optimized for the different fragmentation techniques.

| Fragmentation | SA/CE | MS resolution | MSMS resolution | Max. injection time (ms) |
|---------------|-------|---------------|-----------------|--------------------------|
| ETD           | 10    | 60000         | 30000           | 125                      |
| EThcD         | 40    | 60000         | 30000           | 125                      |
| HCD           | 35    | 60000         | 30000           | 125                      |

**Table S-6.** Summary of the effect of deconvolution on Mascot and Sequest for the identification of middle-range peptides. Specific searches were performed by Sequest on non deconvoluted (a) and on deconvoluted spectra (b) as well as by Mascot on non deconvoluted (c) and on deconvoluted spectra (d). The number of peptides and proteins and summarized as well as the identifications rate (Id rate) and the median Mw and Score (XCcorr and Ion Score, respectively).

a)

| Digestion   | Fragmentation | Proteins | Unique peptides | PSMs   | MS/MS  | Id rate (%) | Mw (Da) | Score |
|-------------|---------------|----------|-----------------|--------|--------|-------------|---------|-------|
| Asp-N       | ETHcD         | 5554     | 26688           | 82663  | 178059 | 46.4        | 1867    | 9.6   |
| Asp-N       | HCD           | 6722     | 36307           | 119994 | 349702 | 34.3        | 1831    | 4.5   |
| Asp-N       | ETD           | 5069     | 19147           | 54451  | 185089 | 29.4        | 1958    | 6.2   |
| Glu-C       | ETHcD         | 4723     | 22892           | 80802  | 211235 | 38.3        | 1852    | 10.1  |
| Glu-C       | HCD           | 5272     | 25639           | 95203  | 372620 | 25.5        | 1860    | 4.7   |
| Glu-C       | ETD           | 4188     | 15486           | 44267  | 192643 | 23.0        | 1894    | 5.6   |
| Formic Acid | ETHcD         | 3265     | 12922           | 33314  | 186812 | 17.8        | 1915    | 9.5   |
| Formic Acid | HCD           | 3751     | 14364           | 38332  | 343772 | 11.2        | 1894    | 4.7   |
| Formic Acid | ETD           | 2885     | 8935            | 18812  | 170125 | 11.1        | 1954    | 5.5   |

b)

| Digestion   | Fragmentation | Proteins | Unique peptides | PSMs   | MS/MS  | Id rate (%) | Mw (Da) | Score |
|-------------|---------------|----------|-----------------|--------|--------|-------------|---------|-------|
| Asp-N       | ETHcD         | 5445     | 26421           | 81341  | 178059 | 45.7        | 1884    | 6.2   |
| Asp-N       | HCD           | 6810     | 35728           | 116324 | 349702 | 33.3        | 1868    | 3.4   |
| Asp-N       | ETD           | 5105     | 17312           | 49108  | 185089 | 26.5        | 2034    | 3.6   |
| Glu-C       | ETHcD         | 4674     | 22905           | 79831  | 211235 | 37.8        | 1858    | 6.4   |
| Glu-C       | HCD           | 5246     | 25902           | 93664  | 372620 | 25.1        | 1877    | 3.5   |
| Glu-C       | ETD           | 4128     | 13205           | 37272  | 192643 | 19.3        | 1991    | 3.5   |
| Formic Acid | ETHcD         | 3294     | 12968           | 33325  | 186812 | 17.8        | 1932    | 6.3   |
| Formic Acid | HCD           | 3755     | 14273           | 37904  | 343772 | 11.0        | 1936    | 3.5   |
| Formic Acid | ETD           | 2850     | 7876            | 16397  | 170125 | 9.6         | 2050    | 3.5   |

c)

| Digestion   | Fragmentation | Proteins | Unique peptides | PSMs   | MS/MS  | Id rate (%) | Mw (Da) | Score |
|-------------|---------------|----------|-----------------|--------|--------|-------------|---------|-------|
| Asp-N       | ETHcD         | 5218     | 23228           | 83580  | 178059 | 46.9        | 1833    | 43.1  |
| Asp-N       | HCD           | 6306     | 23580           | 117487 | 349702 | 33.6        | 1728    | 38.2  |
| Asp-N       | ETD           | 4781     | 14278           | 60471  | 185089 | 32.7        | 1738    | 35.7  |
| Glu-C       | ETHcD         | 4578     | 20724           | 82673  | 211235 | 39.1        | 1809    | 44.3  |
| Glu-C       | HCD           | 4978     | 18771           | 96786  | 372620 | 26.0        | 1741    | 39.3  |
| Glu-C       | ETD           | 3952     | 11655           | 49602  | 192643 | 25.7        | 1703    | 36.0  |
| Formic Acid | ETHcD         | 2908     | 9922            | 29198  | 186812 | 15.6        | 1661    | 42.5  |
| Formic Acid | HCD           | 3222     | 8244            | 32646  | 343772 | 9.5         | 1605    | 35.7  |
| Formic Acid | ETD           | 2524     | 6184            | 18839  | 170125 | 11.1        | 1631    | 36.2  |

d)

| Digestion   | Fragmentation | Proteins | Unique peptides | PSMs   | MS/MS  | Id rate (%) | Mw (Da) | Score |
|-------------|---------------|----------|-----------------|--------|--------|-------------|---------|-------|
| Asp-N       | ETHcD         | 5292     | 25631           | 86196  | 178059 | 48.4        | 1913    | 66.1  |
| Asp-N       | HCD           | 6492     | 31033           | 130986 | 349702 | 37.5        | 1827    | 49.3  |
| Asp-N       | ETD           | 4985     | 19314           | 69766  | 185089 | 37.7        | 1903    | 62.2  |
| Glu-C       | ETHcD         | 4553     | 22700           | 85306  | 211235 | 40.4        | 1878    | 67.4  |
| Glu-C       | HCD           | 5104     | 23870           | 106082 | 372620 | 28.5        | 1846    | 49.7  |
| Glu-C       | ETD           | 4089     | 15354           | 56311  | 192643 | 29.2        | 1846    | 62.3  |
| Formic Acid | ETHcD         | 2928     | 10721           | 29705  | 186812 | 15.9        | 1712    | 58.1  |
| Formic Acid | HCD           | 3388     | 10544           | 34862  | 343772 | 10.1        | 1684    | 43.6  |
